# Supplementary material for: ProMod3—A versatile homology modelling toolbox
Source: PubMed Central journal article supplement (PMC7872268; doi:10.1371/journal.pcbi.1008667), 2021-01-28
Supplement: pcbi.1008667.s004.pdf [file pcbi.1008667.s004.pdf]

| Length | Fraction Covered | Fraction Covered (Coil) |
|--------|------------------|-------------------------|
| 3      | 1.000            | 1.000                   |
| 4      | 1.000            | 1.000                   |
| 5      | 1.000            | 1.000                   |
| 6      | 1.000            | 1.000                   |
| 7      | 1.000            | 1.000                   |
| 8      | 1.000            | 1.000                   |
| 9      | 1.000            | 1.000                   |
| 10     | 0.995            | 0.984                   |
| 11     | 0.981            | 0.907                   |
| 12     | 0.937            | 0.791                   |
| 13     | 0.905            | 0.592                   |
| 14     | 0.847            | 0.500                   |
| 15     | 0.809            | 0.366                   |
