# Supplementary material for: ProMod3—A versatile homology modelling toolbox
Source: PubMed Central journal article supplement (PMC7872268; doi:10.1371/journal.pcbi.1008667), 2021-01-28
Supplement: pcbi.1008667.s005.pdf [file pcbi.1008667.s005.pdf]

|     |      | $X_1$ correct (%)    |                      |        | Avg. RMSD            |                      |        | N Clashing Residues  |                      |        |
|-----|------|----------------------|----------------------|--------|----------------------|----------------------|--------|----------------------|----------------------|--------|
| AA  | N    | ProMod3 <sup>a</sup> | ProMod3 <sup>b</sup> | SCWRL4 | ProMod3 <sup>a</sup> | ProMod3 <sup>b</sup> | SCWRL4 | ProMod3 <sup>a</sup> | ProMod3 <sup>b</sup> | SCWRL4 |
| ARG | 3601 | 73.67                | 73.76                | 74.23  | 1.96                 | 1.97                 | 1.93   | 6                    | 156                  | 159    |
| ASN | 2875 | 83.34                | 83.17                | 81.60  | 0.63                 | 0.63                 | 0.67   | 1                    | 9                    | 7      |
| ASP | 4012 | 82.01                | 82.28                | 81.56  | 0.77                 | 0.77                 | 0.82   | 3                    | 38                   | 34     |
| CYS | 999  | 87.89                | 87.69                | 87.99  | 0.18                 | 0.18                 | 0.20   | 2                    | 2                    | 1      |
| GLN | 2501 | 75.77                | 76.33                | 75.37  | 1.11                 | 1.11                 | 1.13   | 1                    | 15                   | 18     |
| GLU | 4611 | 70.11                | 70.07                | 69.29  | 1.49                 | 1.48                 | 1.49   | 0                    | 83                   | 90     |
| HIS | 1542 | 84.95                | 85.02                | 83.72  | 0.89                 | 0.89                 | 0.95   | 2                    | 17                   | 25     |
| ILE | 3964 | 95.86                | 95.71                | 95.31  | 0.26                 | 0.26                 | 0.27   | 3                    | 13                   | 9      |
| LEU | 6554 | 88.74                | 88.59                | 87.60  | 0.33                 | 0.33                 | 0.36   | 6                    | 13                   | 21     |
| LYS | 3819 | 74.94                | 75.18                | 74.31  | 1.12                 | 1.13                 | 1.14   | 0                    | 15                   | 18     |
| MET | 1406 | 81.58                | 81.93                | 80.94  | 0.74                 | 0.75                 | 0.78   | 0                    | 4                    | 1      |
| PHE | 2715 | 94.00                | 92.04                | 92.08  | 0.61                 | 0.67                 | 0.72   | 7                    | 18                   | 22     |
| PRO | 3230 | 80.93                | 80.93                | 80.80  | 0.14                 | 0.14                 | 0.14   | 4                    | 3                    | 6      |
| SER | 4101 | 69.06                | 69.03                | 69.11  | 0.32                 | 0.32                 | 0.33   | 1                    | 6                    | 5      |
| THR | 3784 | 89.27                | 89.19                | 89.48  | 0.21                 | 0.21                 | 0.21   | 1                    | 4                    | 11     |
| TRP | 979  | 89.68                | 87.54                | 87.44  | 0.99                 | 1.07                 | 1.10   | 3                    | 25                   | 21     |
| TYR | 2346 | 92.16                | 90.58                | 90.49  | 0.74                 | 0.80                 | 0.86   | 13                   | 118                  | 104    |
| VAL | 5018 | 93.08                | 93.20                | 92.63  | 0.25                 | 0.24                 | 0.26   | 1                    | 4                    | 4      |
